# Supplementary material for: Effect of Quality Lean Manufacturing Tools on Commercial Benefits Gained by Mexican Maquiladoras
Source: MDPI journal article supplement (doi:10.3390/math9090971), 2021-04-26
Supplement: s1 [file s1]

### T ratios for path coefficients

|                            | <i>TQM</i> | <i>RFT</i> | <i>Wastes</i> |
|----------------------------|------------|------------|---------------|
| <i>RFT</i>                 | 5.892      |            | 6.96          |
| <i>Wastes</i>              | 7.365      |            |               |
| <i>Commercial benefits</i> | 1.594      | 4.391      | 4.655         |

### Confidence intervals for path coefficients

| Variables                  | <i>TQM</i> |       | <i>RFT</i> |       | <i>Wastes</i> |       |
|----------------------------|------------|-------|------------|-------|---------------|-------|
|                            | LCI        | UCI   | LCI        | UCI   | LCI           | UCI   |
| <i>RFT</i>                 | 0.277      | 0.554 |            |       | 0.348         | 0.62  |
| <i>Wastes</i>              | 0.374      | 0.645 |            |       |               |       |
| <i>Commercial benefits</i> | 0.097      | 0.267 | 0.175      | 0.457 | 0.193         | 0.475 |

### T ratios for loadings

| Items       | <i>TQM</i> | <i>RFT</i> | <i>Wastes</i> | <i>Commercial benefits</i> |
|-------------|------------|------------|---------------|----------------------------|
| <i>TQM2</i> | 12.376     |            |               |                            |
| <i>TQM3</i> | 12.337     |            |               |                            |
| <i>TQM4</i> | 12.881     |            |               |                            |
| <i>TQM5</i> | 12.72      |            |               |                            |
| <i>RFT2</i> |            | 13.241     |               |                            |
| <i>RFT3</i> |            | 13.288     |               |                            |
| <i>RFT4</i> |            | 13.664     |               |                            |
| <i>RFT5</i> |            | 13.081     |               |                            |
| <i>W4</i>   |            |            | 12.749        |                            |
| <i>W5</i>   |            |            | 13.719        |                            |
| <i>W6</i>   |            |            | 13.277        |                            |
| <i>W8</i>   |            |            | 12.89         |                            |
| <i>BRC1</i> |            |            |               | 14.129                     |
| <i>BRC2</i> |            |            |               | 14.136                     |
| <i>BRC6</i> |            |            |               | 12.645                     |

### Confidence intervals for loadings

| Items       | <i>TQM</i> |       | <i>RFT</i> |       | <i>Wastes</i> |       | <i>Commercial benefits</i> |       |
|-------------|------------|-------|------------|-------|---------------|-------|----------------------------|-------|
|             | LCI        | UCI   | LCI        | UCI   | LCI           | UCI   | LCI                        | UCI   |
| <i>TQM2</i> | 0.677      | 0.932 |            |       |               |       |                            |       |
| <i>TQM3</i> | 0.675      | 0.93  |            |       |               |       |                            |       |
| <i>TQM4</i> | 0.706      | 0.959 |            |       |               |       |                            |       |
| <i>TQM5</i> | 0.697      | 0.951 |            |       |               |       |                            |       |
| <i>RFT2</i> |            |       | 0.726      | 0.978 |               |       |                            |       |
| <i>RFT3</i> |            |       | 0.729      | 0.981 |               |       |                            |       |
| <i>RFT4</i> |            |       | 0.75       | 1.001 |               |       |                            |       |
| <i>RFT5</i> |            |       | 0.717      | 0.97  |               |       |                            |       |
| <i>W4</i>   |            |       |            |       | 0.698         | 0.952 |                            |       |
| <i>W5</i>   |            |       |            |       | 0.753         | 1.004 |                            |       |
| <i>W6</i>   |            |       |            |       | 0.728         | 0.98  |                            |       |
| <i>W8</i>   |            |       |            |       | 0.706         | 0.96  |                            |       |
| <i>BRC1</i> |            |       |            |       |               |       | 0.775                      | 1.025 |
| <i>BRC2</i> |            |       |            |       |               |       | 0.776                      | 1.026 |
| <i>BRC6</i> |            |       |            |       |               |       | 0.692                      | 0.947 |

### T ratios for weights

| Items       | <i>TQM</i> | <i>RFT</i> | <i>Wastes</i> | <i>Commercial benefits</i> |
|-------------|------------|------------|---------------|----------------------------|
| <i>TQM2</i> | 4.185      |            |               |                            |
| <i>TQM3</i> | 4.173      |            |               |                            |
| <i>TQM4</i> | 4.339      |            |               |                            |
| <i>TQM5</i> | 4.29       |            |               |                            |
| <i>RFT2</i> |            | 4.012      |               |                            |
| <i>RFT3</i> |            | 4.025      |               |                            |
| <i>RFT4</i> |            | 4.126      |               |                            |
| <i>RFT5</i> |            | 3.968      |               |                            |
| <i>W4</i>   |            |            | 3.961         |                            |
| <i>W5</i>   |            |            | 4.231         |                            |
| <i>W6</i>   |            |            | 4.109         |                            |
| <i>W8</i>   |            |            | 4             |                            |
| <i>BRC1</i> |            |            |               | 5.538                      |
| <i>BTC2</i> |            |            |               | 5.541                      |
| <i>BRC6</i> |            |            |               | 5.008                      |

### Confidence intervals for weights

| Items       | <i>TQM</i> |       | <i>RFT</i> |       | <i>Wastes</i> |       | <i>Commercial benefits</i> |       |
|-------------|------------|-------|------------|-------|---------------|-------|----------------------------|-------|
|             | LCI        | UCI   | LCI        | UCI   | LCI           | UCI   | LCI                        | UCI   |
| <i>TQM2</i> | 0.161      | 0.444 |            |       |               |       |                            |       |
| <i>TQM3</i> | 0.16       | 0.443 |            |       |               |       |                            |       |
| <i>TQM4</i> | 0.171      | 0.454 |            |       |               |       |                            |       |
| <i>TQM5</i> | 0.168      | 0.451 |            |       |               |       |                            |       |
| <i>RFT2</i> |            |       | 0.149      | 0.432 |               |       |                            |       |
| <i>RFT3</i> |            |       | 0.149      | 0.433 |               |       |                            |       |
| <i>RFT4</i> |            |       | 0.157      | 0.44  |               |       |                            |       |
| <i>RFT5</i> |            |       | 0.145      | 0.429 |               |       |                            |       |
| <i>W4</i>   |            |       |            |       | 0.145         | 0.429 |                            |       |
| <i>W5</i>   |            |       |            |       | 0.164         | 0.447 |                            |       |
| <i>W6</i>   |            |       |            |       | 0.155         | 0.439 |                            |       |
| <i>W8</i>   |            |       |            |       | 0.148         | 0.432 |                            |       |
| <i>BRC1</i> |            |       |            |       |               |       | 0.254                      | 0.531 |
| <i>BRC2</i> |            |       |            |       |               |       | 0.254                      | 0.532 |
| <i>BRC6</i> |            |       |            |       |               |       | 0.218                      | 0.497 |

### PLSc reliabilities (Dijkstra's rho)

| <i>TQM</i> | <i>RFT</i> | <i>Wastes</i> | <i>Commercial benefits</i> |
|------------|------------|---------------|----------------------------|
| 0.836      | 0.88       | 0.877         | 0.852                      |

### PLSc loadings

| Items       | <i>TQM</i> | <i>RFT</i> | <i>Wastes</i> | <i>Commercial benefits</i> |
|-------------|------------|------------|---------------|----------------------------|
| <i>TQM2</i> | 0.825      |            |               |                            |
| <i>TQM3</i> | 0.686      |            |               |                            |
| <i>TQM4</i> | 0.717      |            |               |                            |
| <i>TQM5</i> | 0.742      |            |               |                            |
| <i>RFT2</i> |            | 0.834      |               |                            |
| <i>RFT3</i> |            | 0.821      |               |                            |
| <i>RFT4</i> |            | 0.754      |               |                            |
| <i>RFT5</i> |            | 0.798      |               |                            |
| <i>W4</i>   |            |            | 0.691         |                            |
| <i>W5</i>   |            |            | 0.869         |                            |
| <i>W6</i>   |            |            | 0.739         |                            |
| <i>W8</i>   |            |            | 0.853         |                            |
| <i>BRC1</i> |            |            |               | 0.843                      |
| <i>BRC2</i> |            |            |               | 0.841                      |
| <i>BRC6</i> |            |            |               | 0.733                      |

**P values for loadings (two-tailed)**

| <b>Items</b> | <i>TQM</i> | <i>RFT</i> | <i>Wastes</i> | <i>Commercial<br/>benefits</i> |
|--------------|------------|------------|---------------|--------------------------------|
| <i>TQM2</i>  | <0.001     |            |               |                                |
| <i>TQM3</i>  | <0.001     |            |               |                                |
| <i>TQM4</i>  | <0.001     |            |               |                                |
| <i>TQM5</i>  | <0.001     |            |               |                                |
| <i>RFT2</i>  |            | <0.001     |               |                                |
| <i>RFT3</i>  |            | <0.001     |               |                                |
| <i>RFT4</i>  |            | <0.001     |               |                                |
| <i>RFT5</i>  |            | <0.001     |               |                                |
| <i>W4</i>    |            |            | <0.001        |                                |
| <i>W5</i>    |            |            | <0.001        |                                |
| <i>W6</i>    |            |            | <0.001        |                                |
| <i>W8</i>    |            |            | <0.001        |                                |
| <i>BRC1</i>  |            |            |               | <0.001                         |
| <i>BRC2</i>  |            |            |               | <0.001                         |
| <i>BRC6</i>  |            |            |               | <0.001                         |
